# Supplementary material for: Dihydroartemisinin-loaded Magnetic Nanoparticles for Enhanced Chemodynamic Therapy
Source: bioRxiv or medRxiv preprint supplement (doi:10.1101/2019.12.20.885400), 2019-12-23
Supplement: Supplementary file [file media-1.pdf]

## Supplementary Material

Supplementary Table S1. The DLS data of MNP and drug-loaded MNP.

| Samples | Size (nm) | PDI   |
|---------|-----------|-------|
| MNP     | 200       | 0.013 |
| MNP-ART | 212       | 0.065 |
| MNP-DHA | 204       | 0.026 |
| MNP-AS  | 204       | 0.092 |

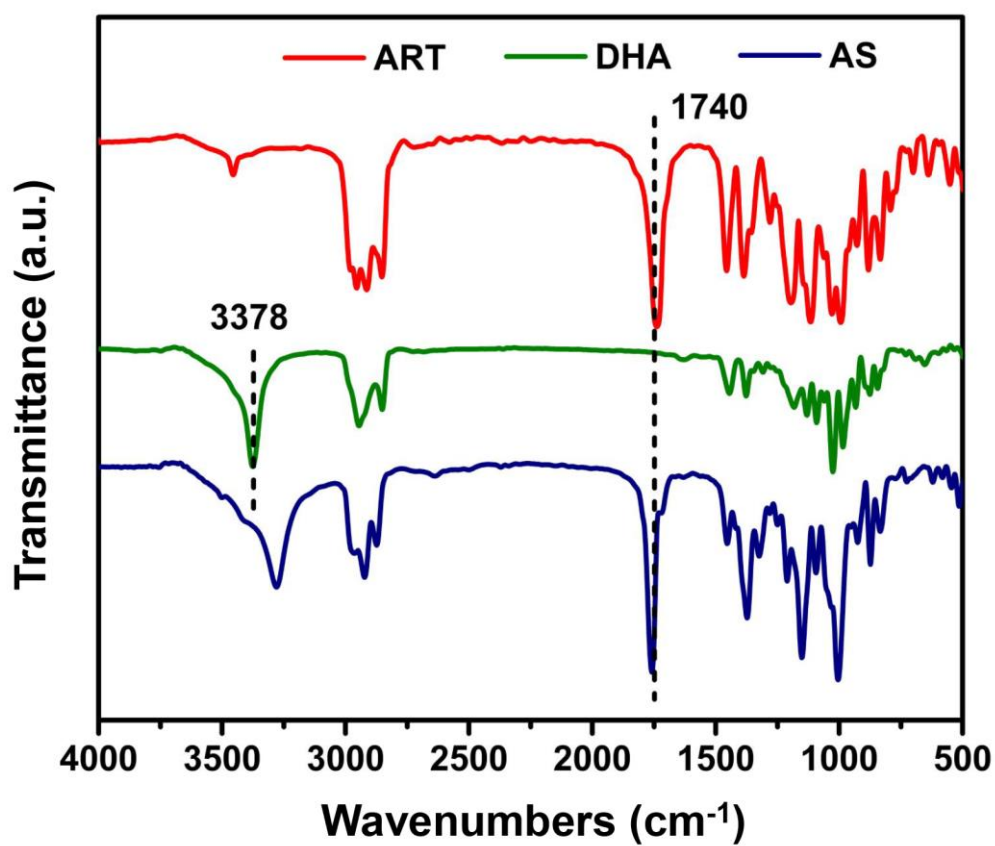

Supplementary Figure S1. FT-IR spectra of ART, DHA, and AS.

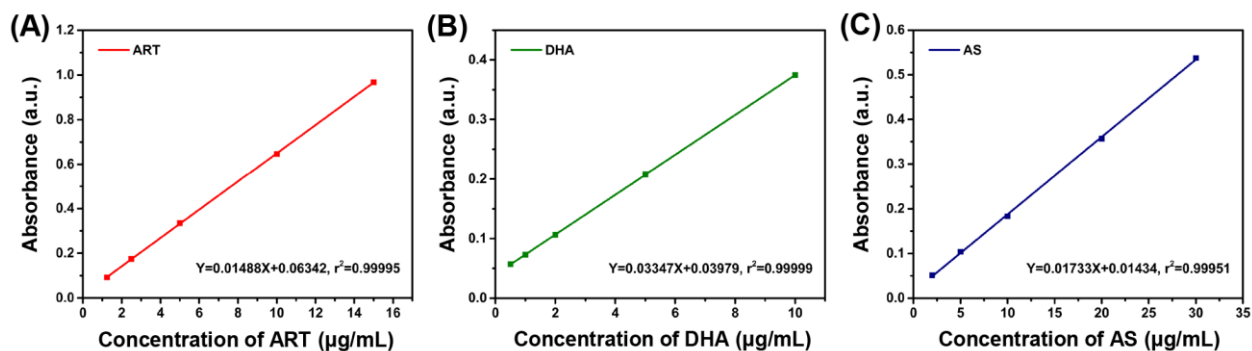

Supplementary Figure S2. Standard curves of (A) ART, (B) DHA, and (C) AS concentration.

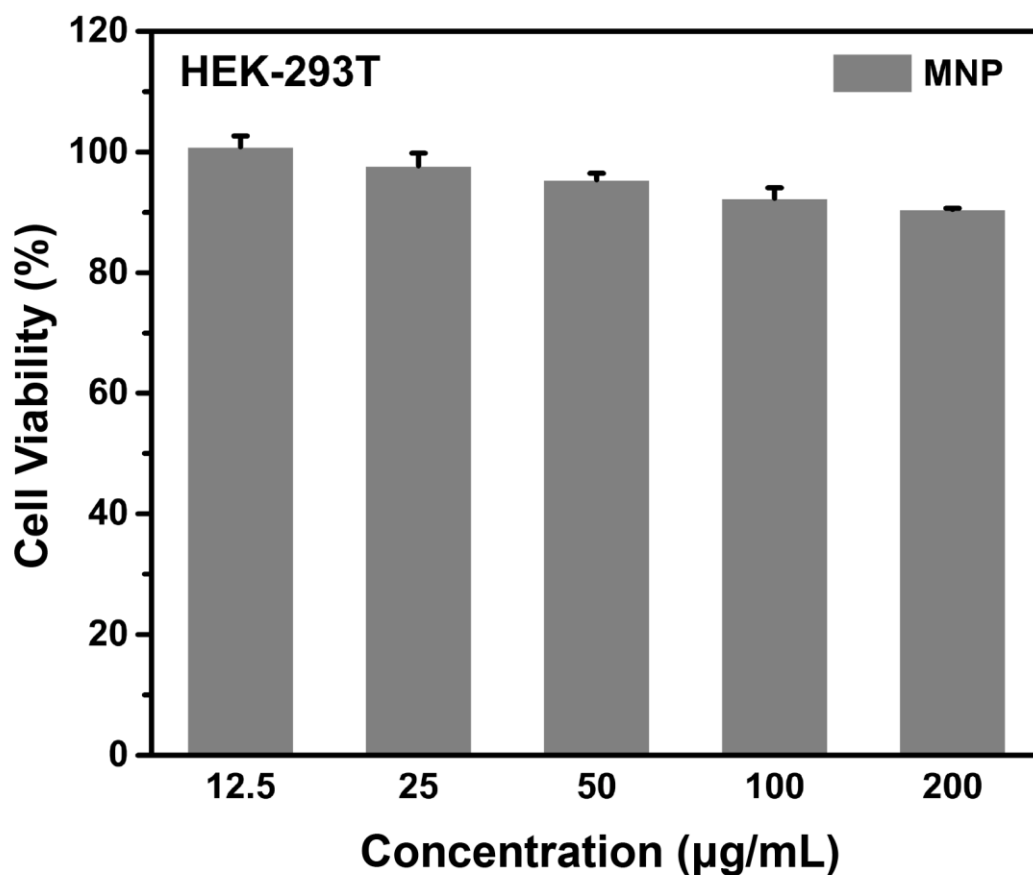

Supplementary Figure S3. Cell viability of HEK-293T cells after 24 h incubation with MNP suspensions at different concentrations.
